# Supplementary material
Source: PubMed Central journal article supplement (PMC6837840)
Supplement: NIHMS1533911-supplement-clean-r2-multimodal_supplementary.pdf [file NIHMS1533911-supplement-clean-r2-multimodal_supplementary.pdf]

APPENDIX  
SUPPLEMENTARY FIGURES AND TABLES

TABLE A.1  
SLEEP DETECTION ACCURACY WITH BEST RESULTS HIGHLIGHTED IN BOLD.

| Feature combinations | Bi-LSTM RNN  |             | ANN          |           | Logistic regression |           | SVM          |           |
|----------------------|--------------|-------------|--------------|-----------|---------------------|-----------|--------------|-----------|
|                      | Without time | With time   | Without time | With time | Without time        | With time | Without time | With time |
| Wrist sensor         | 95.9         | 96.5        | 91.2         | 93.5      | 87.2                | 88.6      | 88.3         | 90.0      |
| Phone                | 76.7         | 89.1        | 71.4         | 87.2      | 71.4                | 74.7      | 71.4         | 81.3      |
| Wrist + Phone        | 96.0         | 96.3        | 91.4         | 93.7      | 87.6                | 89.0      | 88.7         | 90.3      |
| ACC + EDA            | 95.6         | 96.3        | 90.0         | 92.9      | 85.1                | 87.9      | 87.3         | 89.4      |
| ACC + ST             | <b>96.2</b>  | <b>96.5</b> | 91.0         | 93.3      | 87.1                | 88.5      | 88.1         | 90.0      |
| EDA + ST             | 92.5         | 94.5        | 84.8         | 91.3      | 82.2                | 84.5      | 82.3         | 84.7      |
| ACC                  | 95.5         | 96.3        | 89.6         | 92.6      | 87.9                | 88.1      | 87.2         | 89.2      |
| EDA                  | 90.8         | 93.7        | 78.8         | 89.8      | 72.7                | 78.0      | 72.8         | 80.3      |
| ST                   | 86.7         | 90.7        | 81.2         | 89.4      | 81.1                | 82.8      | 81.2         | 83.1      |
| Actigraphy           | 94.1         |             |              |           |                     |           |              |           |

TABLE A.2

THE STATISTICS OF SLEEP DETECTION ACCURACY ACROSS  $N = 149$  PARTICIPANTS. RIGHT-TAILED PAIRED T-TESTS WERE CONDUCTED BETWEEN EACH FEATURE COMBINATION AND THE ACTIGRAPHY-ONLY METHOD WITH T-VALUES AND P-VALUES ALSO SHOWN IN THE TABLE. A STAR AFTER A P-VALUE INDICATES THAT THE RESULT IS SIGNIFICANTLY BETTER THAN THAT OF THE ACTIGRAPHY-ONLY METHOD AT THE 5% SIGNIFICANCE LEVEL.

| Feature combinations | Without time |     |        |                         | With time |      |        |                         |
|----------------------|--------------|-----|--------|-------------------------|-----------|------|--------|-------------------------|
|                      | Mean         | SD  | t(149) | p                       | Mean      | SD   | t(149) | p                       |
| Wrist sensor         | 95.8         | 3.3 | 4.12   | $3.12 \times 10^{-5} *$ | 96.3      | 2.9  | -21.40 | $1.42 \times 10^{-7} *$ |
| Phone                | 76.9         | 8.6 | 76.9   | 1.00                    | 89.0      | 5.4  | -8.99  | 1.00                    |
| Wrist + Phone        | 95.9         | 3.1 | 4.55   | $5.56 \times 10^{-6} *$ | 96.3      | 2.8  | 5.18   | $3.61 \times 10^{-7} *$ |
| ACC + EDA            | 95.5         | 3.7 | 4.16   | $2.66 \times 10^{-5} *$ | 96.2      | 3.0  | 5.14   | $4.29 \times 10^{-7} *$ |
| ACC + ST             | 96.1         | 3.1 | 4.93   | $1.07 \times 10^{-6} *$ | 96.4      | 3.0  | 5.41   | $1.26 \times 10^{-7} *$ |
| EDA + ST             | 92.5         | 5.6 | -2.39  | 0.99                    | 94.5      | 3.7  | 1.00   | 0.16                    |
| ACC                  | 95.3         | 4.1 | 3.72   | $1.41 \times 10^{-4} *$ | 95.4      | 4.2  | 3.93   | $6.50 \times 10^{-5} *$ |
| EDA                  | 90.8         | 7.2 | -4.61  | 1.00                    | 72.7      | 93.7 | -0.56  | 0.71                    |
| ST                   | 86.5         | 5.7 | -12.60 | 1.00                    | 90.7      | 4.7  | -6.10  | 1.00                    |
| Actigraphy           | 94.0         | 5.5 |        |                         |           |      |        |                         |

TABLE A.3

SLEEP DETECTION ACCURACY COMPARISON (BIDIRECTIONAL LSTM MODELS WITH DATA SPLIT BY DAYS AND PARTICIPANTS AND REAL-TIME LSTM MODEL WITH DATA SPLIT BY DAYS AND PARTICIPANTS).

| Feature Combination | Bidirectional LSTM model |           |                                 |           | LSTM with previous 30 min data |           |
|---------------------|--------------------------|-----------|---------------------------------|-----------|--------------------------------|-----------|
|                     | With data split by days  |           | With data split by participants |           | With data split by days        |           |
|                     | Without time             | With time | Without time                    | With time | Without time                   | With time |
| Wrist sensor        | 95.9                     | 96.5      | 96.0                            | 96.3      | 95.5                           | 96.0      |
| Phone               | 76.7                     | 89.1      | 77.3                            | 88.6      | 74.3                           | 88.1      |
| Wrist + Phone       | 96.0                     | 96.3      | 96.0                            | 96.2      | 95.6                           | 96.0      |
| ACC + EDA           | 95.6                     | 96.3      | 95.8                            | 96.0      | 95.1                           | 95.8      |
| ACC + ST            | 96.2                     | 96.5      | 96.0                            | 96.4      | 95.6                           | 96.1      |
| EDA + ST            | 92.5                     | 94.5      | 92.8                            | 94.7      | 91.7                           | 93.8      |
| ACC                 | 95.5                     | 96.3      | 95.8                            | 96.2      | 94.9                           | 95.7      |
| EDA                 | 90.8                     | 93.7      | 91.9                            | 94.1      | 89.3                           | 93.2      |
| ST                  | 86.7                     | 90.7      | 87.5                            | 91.0      | 85.4                           | 90.5      |

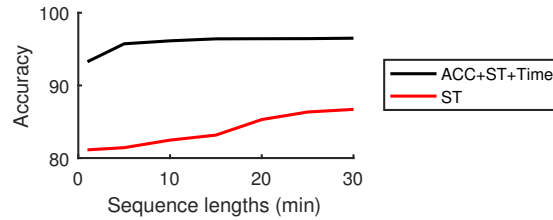

Fig. A.1. Sleep detection accuracy versus the past- and future-looking sequence lengths using two different feature combinations. The performance of sleep detection using the more informative feature combination (ACC+ST+Time) saturates when the sequence length is longer than 15 min, while the performance of using only the ST feature keeps increasing until a sequence length of 30 min. Considering the extra resources cost by longer sequences, the 30-min length we used in all the main experiments proves to be an appropriate choice.

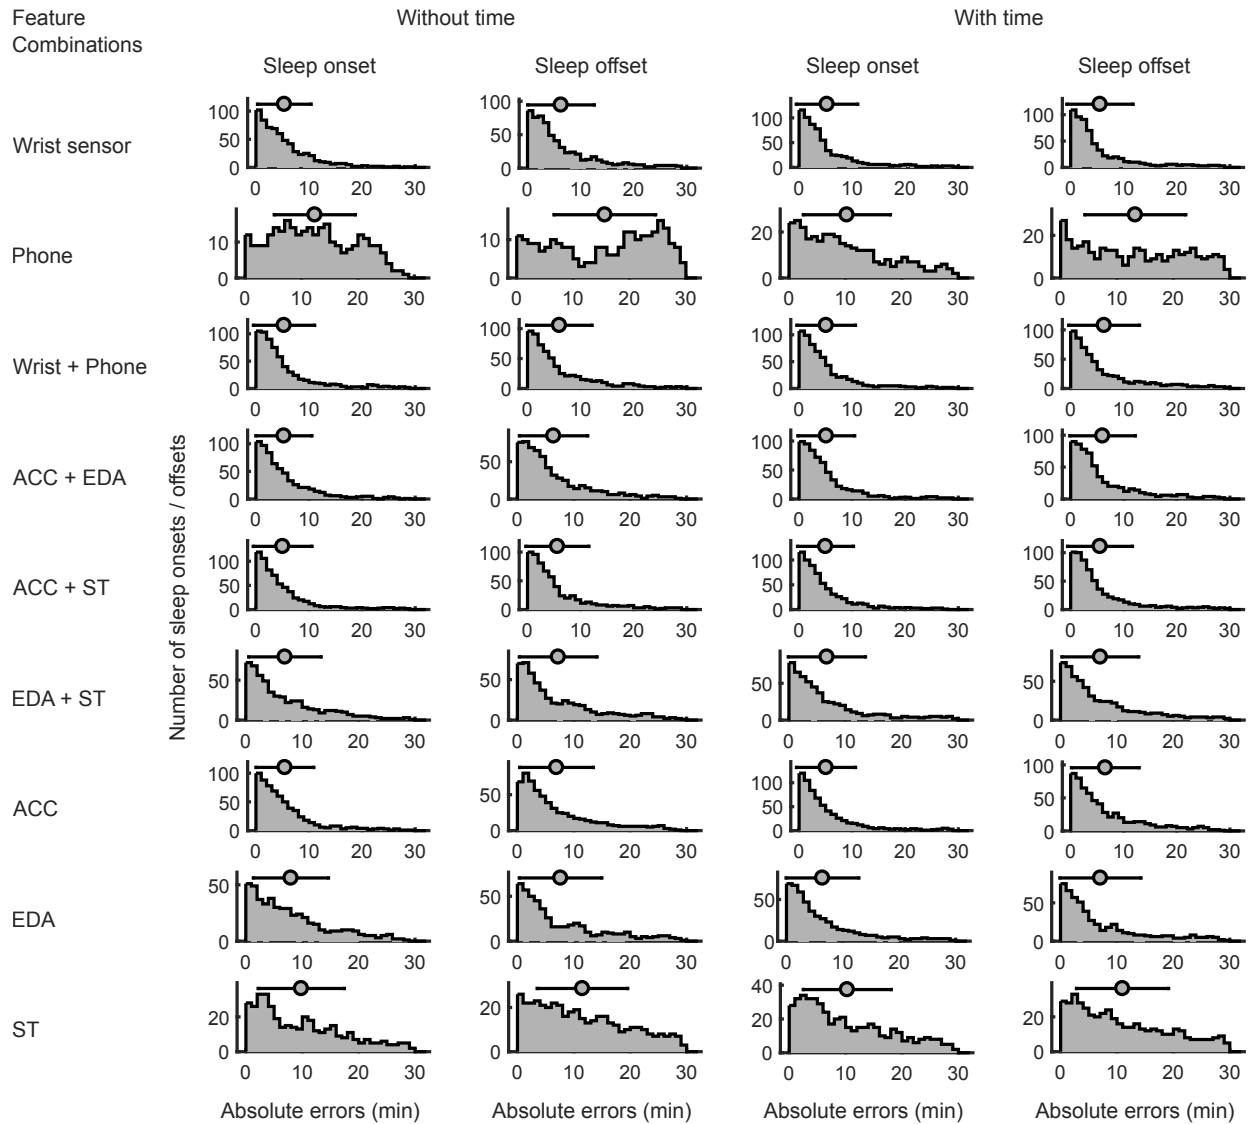

Fig. A.2. Error distributions for sleep episode onset/offset detection using differential Bi-LSTM RNN. The means and standard deviations of the absolute errors are also denoted in each plot.

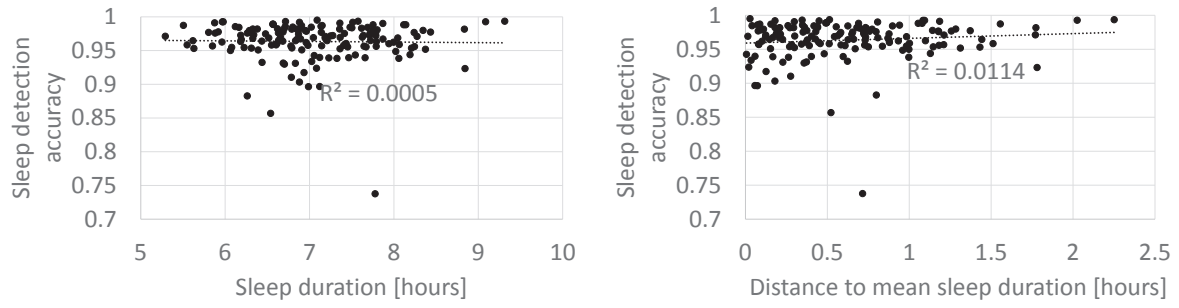

Fig. A.3. (left) Relationship between average sleep duration vs sleep detection accuracy (ACC+ST+time).(right)Relationship between distance to average sleep duration vs sleep detection accuracy (ACC+ST+time).
